# Supplementary material for: Synthesis, crystal structure, thermal analysis, spectroscopic, optical polarizability, and DFT studies, and molecular docking approaches of novel 2-methyl-benzylammonium derivatives for potential anti-inflammatory control
Source: Royal Society of Chemistry journal article supplement (doi:10.1039/d4nj03197k), 2024-01-01
Supplement: d4nj03197k1.pdf [file d4nj03197k1.pdf]

**Synthesis, Crystal structure, Thermal analysis, Spectroscopic, Optical polarizability, DFT studies, and Molecular docking approaches of novel 2-methyl-benzilamonium derivatives for a potential anti-inflammatory control**

**Amal Ferchichi <sup>a</sup>, Jawher Makhoulf <sup>a\*</sup>, Kelechi Chukwuemeka <sup>b</sup>, Arto Valkonen <sup>c</sup> Hatem A.**

**Abuelizz <sup>d</sup>, Rashad Al-Salahi <sup>d</sup>, Youness El Bakri <sup>e\*</sup>, Wajda Smirani <sup>a</sup>**

*<sup>a</sup> Laboratory of Material Chemistry, Faculty of Sciences of Bizerte, University of Carthage, Bizerte Zarzouna, Tunisia*

*<sup>b</sup> Computational and Bio-Simulation Research Group, University of Calabar, Calabar, Nigeria*

*<sup>c</sup> Department of Chemistry, University of Jyvaskyla, 40014 Jyvaskyla, Finland.*

*<sup>d</sup> Department of Pharmaceutical Chemistry, College of Pharmacy, King Saud University, Riyadh 11451, Saudi Arabia.*

*<sup>e</sup> Department of Theoretical and Applied Chemistry, South Ural State University, Lenin prospect 76, Chelyabinsk, 454080, Russian Federation.*

**Corresponding author:** [yns.elbakri@gmail.com](mailto:yns.elbakri@gmail.com); [jawhermakhoulf60@gmail.com](mailto:jawhermakhoulf60@gmail.com)

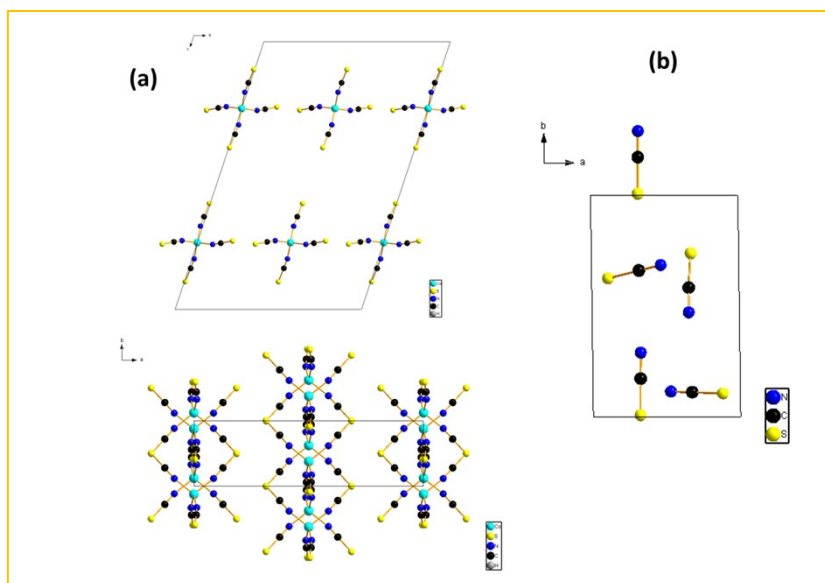

**Fig.S1:** Projection of the anionic part of  $[(C_8H_{12}N)_2 Co(SCN)_4]$  (a) and  $[(C_8H_{12}N), SCN]$  (b)

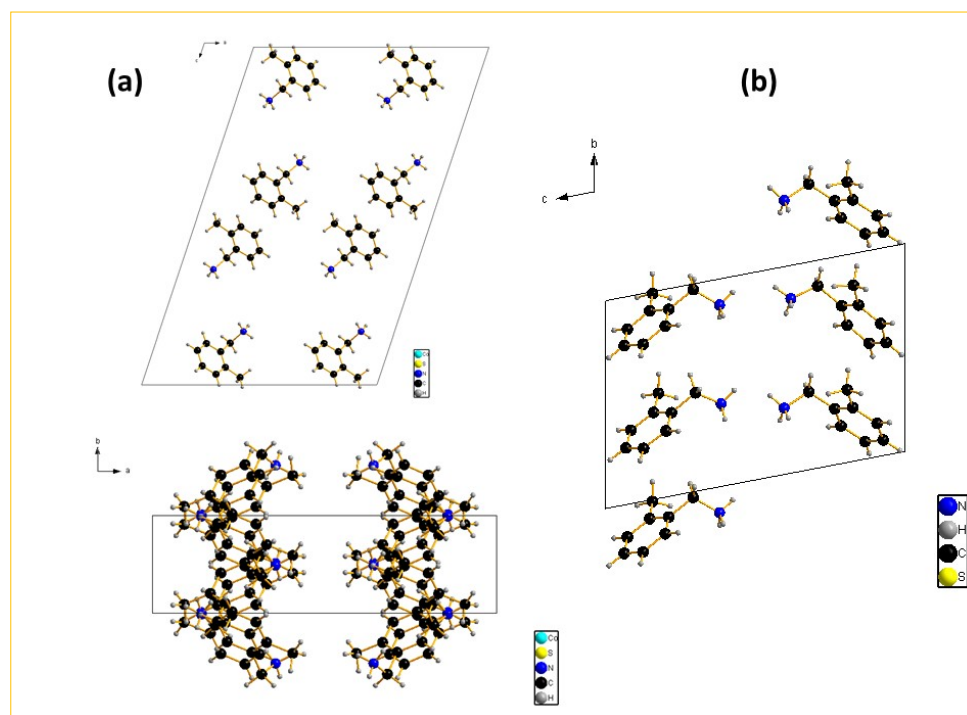

**Fig. S2:** Projection of the cationic part of  $[(C_8H_{12}N)_2 Co(SCN)_4]$  (a) and  $[(C_8H_{12}N), SCN]$  (b)

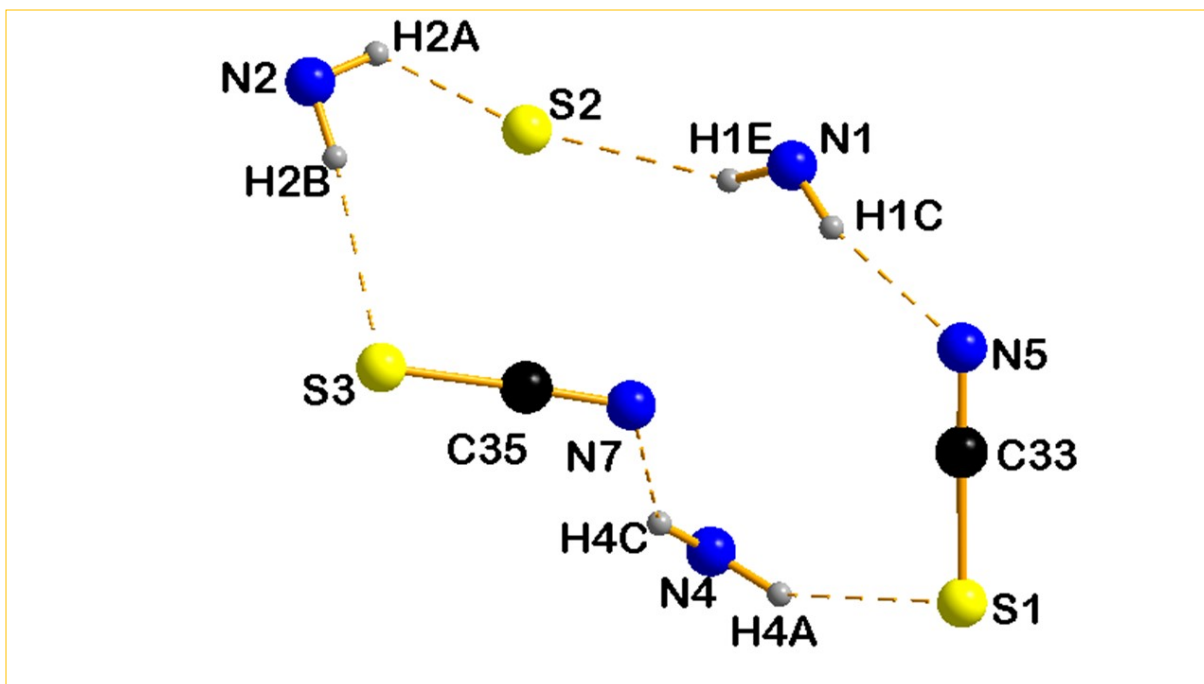

**Fig. S3:** Hydrogen bonds ring of  $[(C_8H_{12}N), SCN]$

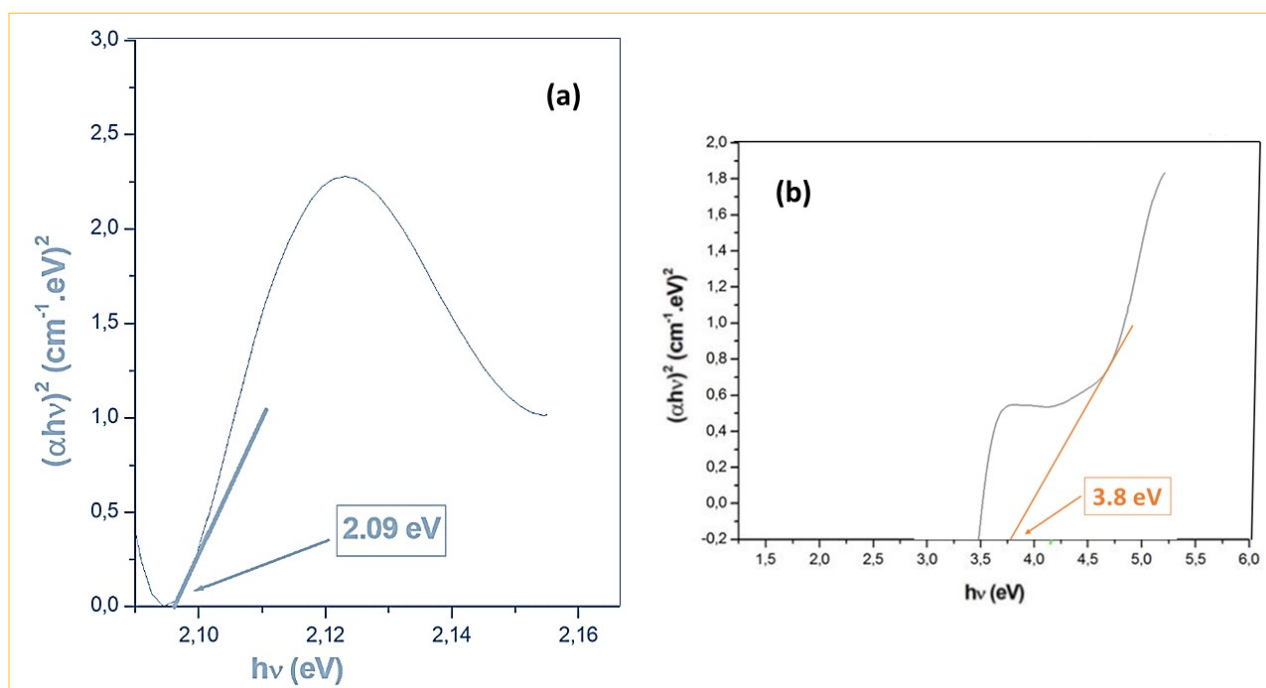

**Fig. S4:** TAUC spectrum of (a)  $[(C_8H_{12}N)_2 Co(SCN)_4]$  (a) and  $[(C_8H_{12}N), SCN]$  (b)
